# Supplementary material for: Healthcare provider perspectives on integrating peer support in non-dialysis-dependent chronic kidney disease care: a mixed methods study
Source: Springer Nature journal article supplement (doi:10.1186/s12882-022-02776-w), 2022-04-18
Supplement: MOESM4 [file 20320814]

**Additional file 4.** Characteristics of in-house peer support programs (from n=14 survey respondents indicating peer support availability through a clinic program)

| Characteristic                                             | Number <sup>a</sup> |
|------------------------------------------------------------|---------------------|
| Who program is intended for:                               |                     |
| Patients with CKD                                          | 10                  |
| Caregivers of patients with CKD                            | 8                   |
| Unsure                                                     | 1                   |
| Who facilitates the peer support program:                  |                     |
| Healthcare provider                                        | 6                   |
| Patient volunteer                                          | 6                   |
| Partner organization                                       | 6                   |
| Unfacilitated                                              | 1                   |
| Format of peer support program:                            |                     |
| One on one                                                 | 6                   |
| Small group (< 10 participants)                            | 6                   |
| Large group (> 10 participants)                            | 2                   |
| How the program is offered:                                |                     |
| Single session or event                                    | 4                   |
| Recurring session or program                               | 5                   |
| Initial event with option for follow-up                    | 2                   |
| Other (e.g., on individual basis, on hold due to pandemic) | 3                   |
| Registered program (i.e., consistent participants)         | 4                   |
| Drop in (i.e., changing participants as needed)            | 4                   |
| Other (e.g., as part of education session)                 | 5                   |
| Mode of delivery:                                          |                     |
| In-person                                                  | 12                  |
| By telephone                                               | 7                   |
| By virtual platform (e.g., Skype, Zoom)                    | 1                   |
| Other                                                      | 3                   |
| Additional features of peer support program:               |                     |
| Educational component                                      | 3                   |
| Opportunities for informal peer support                    | 5                   |
| Unsure                                                     | 4                   |

Note: These questions were presented only to respondents who reported offering in-house peer support in the survey.

<sup>a</sup>Some respondents did not respond to every question offered or selected more than one response, therefore each section does not necessarily total n=14.

Abbreviation: CKD, chronic kidney disease.
