# Supplementary material for: Healthcare provider perspectives on integrating peer support in non-dialysis-dependent chronic kidney disease care: a mixed methods study
Source: Springer Nature journal article supplement (doi:10.1186/s12882-022-02776-w), 2022-04-18
Supplement: MOESM5 [file 20320814]

**Additional file 5.** Characteristics of peer support processes (from n=75 survey respondents indicating peer support awareness)

| Characteristic                                                                         | Number (%) <sup>a</sup> |
|----------------------------------------------------------------------------------------|-------------------------|
| How healthcare providers learn about peer support programs                             |                         |
| Individuals or organizations outside the clinic                                        | 40 (53.3)               |
| Informally from other clinic staff                                                     | 39 (52.0)               |
| In-services or staff education sessions                                                | 28 (37.3)               |
| During staff orientation                                                               | 21 (28.0)               |
| Emails, newsletters                                                                    | 21 (28.0)               |
| Patients and caregivers inform staff                                                   | 9 (12.0)                |
| Other (e.g., internet searches, have always known)                                     | 6 (8.0)                 |
| How patients and caregivers learn about peer support opportunities                     |                         |
| Directly from CKD staff                                                                | 62 (82.7)               |
| Brochures and handouts                                                                 | 44 (58.7)               |
| Posters in waiting room                                                                | 30 (40.0)               |
| New patient orientation                                                                | 25 (33.3)               |
| Group education sessions                                                               | 15 (20.0)               |
| Advertising in newsletters                                                             | 14 (18.7)               |
| Peer support volunteer approaching patients in clinic                                  | 5 (6.7)                 |
| Other (e.g., websites)                                                                 | 2 (2.7)                 |
| Clinic does not share peer support resources                                           | 1 (1.3)                 |
| Unsure                                                                                 | 4 (5.3)                 |
| Who is offered peer support by clinic staff                                            |                         |
| CKD patients with higher support needs                                                 | 27 (36.0)               |
| All CKD patients who attend clinic                                                     | 24 (32.0)               |
| All caregivers of CKD patients who attend clinic                                       | 14 (18.7)               |
| Caregivers of CKD patients with higher support needs                                   | 12 (16.0)               |
| Other (e.g., patient/caregiver directly requests, not routinely offered)               | 6 (8.0)                 |
| Clinic does not offer peer support to patients or caregivers                           | 3 (4.0)                 |
| Unsure                                                                                 | 12 (16.0)               |
| When peer support is discussed with patients and caregivers                            |                         |
| When patient or caregiver appears to need additional support                           | 38 (50.7)               |
| When patient is facing significant decisions                                           | 27 (36.0)               |
| Not routinely discussed                                                                | 23 (30.7)               |
| Upon entry to CKD clinic program, then reintroduced periodically as needed             | 21 (28.0)               |
| Other (e.g., when patient asks, embedded into education sessions)                      | 5 (6.7)                 |
| Upon entry to CKD clinic program only                                                  | 3 (4.0)                 |
| Unsure                                                                                 | 6 (8.0)                 |
| Process for referring patients and their caregivers to peer support programs           |                         |
| Patient/caregiver self-refers to program                                               | 49 (65.3)               |
| Staff member refers patient/caregiver to program                                       | 27 (36.0)               |
| Other (e.g., no specific process, patient directly linked to peer volunteer in clinic) | 6 (8.0)                 |
| Clinic does not refer patients/caregivers to peer support                              | 3 (4.0)                 |
| Peer support volunteer talks to patient/caregiver in clinic, then refers to program    | 2 (2.7)                 |
| Unsure                                                                                 | 7 (9.3)                 |

Healthcare provider perspectives on integrating peer support in non-dialysis-dependent chronic kidney disease: a mixed methods study

Type of support that could trigger referral to peer support

|                                                            |           |
|------------------------------------------------------------|-----------|
| Emotional support                                          | 53 (70.7) |
| Appraisal support                                          | 50 (66.7) |
| Informational support                                      | 48 (64.0) |
| Instrumental support                                       | 12 (16.0) |
| Other (e.g., support with transitions to other modalities) | 1 (1.3)   |
| Unsure                                                     | 2 (2.7)   |

---

Note: These questions were presented only to respondents who reported being aware of peer support programs.

<sup>a</sup>Many respondents chose more than one response for each question, therefore each section does not necessarily total n=75.

Abbreviation: CKD, chronic kidney disease.

Healthcare provider perspectives on integrating peer support in non-dialysis-dependent chronic kidney disease: a mixed methods study
