# Supplementary material for: Healthcare provider perspectives on integrating peer support in non-dialysis-dependent chronic kidney disease care: a mixed methods study
Source: Springer Nature journal article supplement (doi:10.1186/s12882-022-02776-w), 2022-04-18
Supplement: MOESM6 [file 20320814]

**Additional file 6.** Likert scale responses (from n=113 survey respondents)

| Survey question                                                                                                              | Number of respondents | Median score <sup>a</sup> (IQR) |
|------------------------------------------------------------------------------------------------------------------------------|-----------------------|---------------------------------|
| How do you view the need for peer support among CKD patients and their caregivers in your clinic?                            | 94                    | 7.5 (6,9)                       |
| How would you rate the interest of staff within your clinic to offer peer support resources or programs as part of CKD care? | 72                    | 7 (6,9)                         |
| For patients or caregivers who have accessed peer support, how do you think it has impacted their care?                      | 79                    | 6 (5,7)                         |
| How would you rate the interest of CKD patients who attend the CKD clinic and their caregivers in receiving peer support?    | 94                    | 6 (4,8)                         |

<sup>a</sup>Likert scale options ranged from 0 (low) to 10 (high).
